# Supplementary material
Source: bioRxiv or medRxiv preprint supplement (https://www.biorxiv.org/highwire/filestream/3585/field_highwire_adjunct_files/3/013946-4.pdf)
Supplement: Supplementary file [file 013946-4.pdf]

**Table S1. Gene models and download information for data used in the study**

| Species Name                         | Link                                                                                                                                                                                                            |
|--------------------------------------|-----------------------------------------------------------------------------------------------------------------------------------------------------------------------------------------------------------------|
| <i>Acropora digitifera</i>           | <a href="http://marinegenomics.oist.jp/genomes/viewer?project_id=3&amp;current_assembly_version=oist_v1.1">http://marinegenomics.oist.jp/genomes/viewer?project_id=3&amp;current_assembly_version=oist_v1.1</a> |
| <i>Acyrtosiphon pisum</i>            | <a href="ftp://ftp.ensemblgenomes.org/pub/metazoa/release-25/fasta/acyrtosiphon_pisum">ftp://ftp.ensemblgenomes.org/pub/metazoa/release-25/fasta/acyrtosiphon_pisum</a>                                         |
| <i>Amphimedon queenslandica</i>      | <a href="ftp://ftp.ensemblgenomes.org/pub/metazoa/release-25/fasta/amphimedon_queenslandica">ftp://ftp.ensemblgenomes.org/pub/metazoa/release-25/fasta/amphimedon_queenslandica</a>                             |
| <i>Anolis carolinensis</i>           | <a href="ftp://ftp.ensembl.org/pub/release-78/fasta/anolis_carolinensis/">ftp://ftp.ensembl.org/pub/release-78/fasta/anolis_carolinensis/</a>                                                                   |
| <i>Apis mellifera</i>                | <a href="ftp://ftp.ensemblgenomes.org/pub/metazoa/release-25/fasta/apis_mellifera">ftp://ftp.ensemblgenomes.org/pub/metazoa/release-25/fasta/apis_mellifera</a>                                                 |
| <i>Bombus impatiens</i>              | <a href="ftp://ftp.ncbi.nih.gov/genomes/Bombus_impatiens/">ftp://ftp.ncbi.nih.gov/genomes/Bombus_impatiens/</a>                                                                                                 |
| <i>Brranchiostoma floridae</i>       | <a href="http://genome.jgi-psf.org/Brafl1/Brafl1.home.html">http://genome.jgi-psf.org/Brafl1/Brafl1.home.html</a>                                                                                               |
| <i>Brugia malayi</i>                 | <a href="http://www.nematode.net/Data/translations_ftp/BM.trans.final.faa">http://www.nematode.net/Data/translations_ftp/BM.trans.final.faa</a>                                                                 |
| <i>Caenorhabditis elegans</i>        | <a href="ftp://ftp.ensembl.org/pub/release-78/fasta/caenorhabditis_elegans/">ftp://ftp.ensembl.org/pub/release-78/fasta/caenorhabditis_elegans/</a>                                                             |
| <i>Capitella teleta</i>              | <a href="http://genome.jgi-psf.org/Capca1/Capca1.home.html">http://genome.jgi-psf.org/Capca1/Capca1.home.html</a>                                                                                               |
| <i>Ciona intestinalis</i>            | <a href="ftp://ftp.ensembl.org/pub/release-78/fasta/ciona_intestinalis/">ftp://ftp.ensembl.org/pub/release-78/fasta/ciona_intestinalis/</a>                                                                     |
| <i>Danaus plexipus</i>               | <a href="ftp://ftp.ensemblgenomes.org/pub/metazoa/release-25/fasta/danaus_plexippus">ftp://ftp.ensemblgenomes.org/pub/metazoa/release-25/fasta/danaus_plexippus</a>                                             |
| <i>Daphnia pulex</i>                 | <a href="http://genome.jgi-psf.org/Dappu1/Dappu1.download.ftp.html">http://genome.jgi-psf.org/Dappu1/Dappu1.download.ftp.html</a>                                                                               |
| <i>Drosophila melanogaster</i>       | <a href="ftp://ftp.ensembl.org/pub/release-78/fasta/drosophila_melanogaster/">ftp://ftp.ensembl.org/pub/release-78/fasta/drosophila_melanogaster/</a>                                                           |
| <i>Gallus gallus</i>                 | <a href="ftp://ftp.ensembl.org/pub/release-78/fasta/gallus_gallus/">ftp://ftp.ensembl.org/pub/release-78/fasta/gallus_gallus/</a>                                                                               |
| <i>Gasterosteus aculeatus</i>        | <a href="ftp://ftp.ensembl.org/pub/release-78/fasta/gasterosteus_aculeatus/">ftp://ftp.ensembl.org/pub/release-78/fasta/gasterosteus_aculeatus/</a>                                                             |
| <i>Homo sapiens</i>                  | <a href="ftp://ftp.ensembl.org/pub/release-78/fasta/homo_sapiens/">ftp://ftp.ensembl.org/pub/release-78/fasta/homo_sapiens/</a>                                                                                 |
| <i>Hydra magnipapillata</i>          | <a href="ftp://ftp.ncbi.nih.gov/genomes/Hydra_magnipapillata/protein/">ftp://ftp.ncbi.nih.gov/genomes/Hydra_magnipapillata/protein/</a>                                                                         |
| <i>Ixodes scapularis</i>             | <a href="ftp://ftp.ensemblgenomes.org/pub/metazoa/release-25/fasta/ixodes_scapularis">ftp://ftp.ensemblgenomes.org/pub/metazoa/release-25/fasta/ixodes_scapularis</a>                                           |
| <i>Latimeria chalumnae</i>           | <a href="http://useast.ensembl.org/Latimeria_chalumnae/Info/Index?redirect=no">http://useast.ensembl.org/Latimeria_chalumnae/Info/Index?redirect=no</a>                                                         |
| <i>Lottia gigantea</i>               | <a href="http://genome.jgi-psf.org/Lotgi1/Lotgi1.home.html">http://genome.jgi-psf.org/Lotgi1/Lotgi1.home.html</a>                                                                                               |
| <i>Mnemiopsis leidyi</i>             | <a href="http://research.nhgri.nih.gov/mnemiopsis/">http://research.nhgri.nih.gov/mnemiopsis/</a>                                                                                                               |
| <i>Monosiga brvicollis</i>           | <a href="http://genome.jgi-psf.org/Monbr1/Monbr1.home.html">http://genome.jgi-psf.org/Monbr1/Monbr1.home.html</a>                                                                                               |
| <i>Nematostella vectensis</i>        | <a href="http://genome.jgi-psf.org/Nemve1/Nemve1.home.html">http://genome.jgi-psf.org/Nemve1/Nemve1.home.html</a>                                                                                               |
| <i>Oikopleura dioica</i>             | <a href="http://www.genoscope.cns.fr/externe/Download/Projets/Projet_HG/data/annotation/">http://www.genoscope.cns.fr/externe/Download/Projets/Projet_HG/data/annotation/</a>                                   |
| <i>Pinctata fucata</i>               | <a href="http://marinegenomics.oist.jp/genomes/viewer?project_id=20&amp;current_assembly_version=ver1.0">http://marinegenomics.oist.jp/genomes/viewer?project_id=20&amp;current_assembly_version=ver1.0</a>     |
| <i>Rhodnius prolixus</i>             | <a href="ftp://ftp.ensemblgenomes.org/pub/metazoa/release-25/fasta/rhodnius_prolixus">ftp://ftp.ensemblgenomes.org/pub/metazoa/release-25/fasta/rhodnius_prolixus</a>                                           |
| <i>Saccoglossus kowalevskii</i>      | <a href="http://www.ncbi.nlm.nih.gov/protein?linkname=bioproject_protein&amp;from_uid=42857">http://www.ncbi.nlm.nih.gov/protein?linkname=bioproject_protein&amp;from_uid=42857</a>                             |
| <i>Salpingoeca rosetta</i>           | <a href="http://www.broadinstitute.org/annotation/genome/multicellularity_project/FeatureSearch.html">http://www.broadinstitute.org/annotation/genome/multicellularity_project/FeatureSearch.html</a>           |
| <i>Strigamia maritima</i>            | <a href="ftp://ftp.ensemblgenomes.org/pub/metazoa/release-25/fasta/strigamia_maritima">ftp://ftp.ensemblgenomes.org/pub/metazoa/release-25/fasta/strigamia_maritima</a>                                         |
| <i>Strongylocentrotus purpuratus</i> | <a href="ftp://ftp.ensemblgenomes.org/pub/metazoa/release-25/fasta/strongylocentrotus_purpuratus/pep/">ftp://ftp.ensemblgenomes.org/pub/metazoa/release-25/fasta/strongylocentrotus_purpuratus/pep/</a>         |
| <i>Takifugu rubripes</i>             | <a href="ftp://ftp.ensembl.org/pub/release-78/fasta/takifugu_rubripes/">ftp://ftp.ensembl.org/pub/release-78/fasta/takifugu_rubripes/</a>                                                                       |
| <i>Tetranychus uticiae</i>           | <a href="ftp://ftp.ensemblgenomes.org/pub/metazoa/release-25/fasta/tetranychus_urticae">ftp://ftp.ensemblgenomes.org/pub/metazoa/release-25/fasta/tetranychus_urticae</a>                                       |
| <i>Tribolium castaneum</i>           | <a href="ftp://ftp.ncbi.nih.gov/genomes/Tribolium_castaneum/">ftp://ftp.ncbi.nih.gov/genomes/Tribolium_castaneum/</a>                                                                                           |
| <i>Trichoplax adhaerens</i>          | <a href="http://genome.jgi-psf.org/Triad1/Triad1.home.html">http://genome.jgi-psf.org/Triad1/Triad1.home.html</a>                                                                                               |
| <i>Xenopus tropicalis</i>            | <a href="ftp://ftp.ensembl.org/pub/release-78/fasta/xenopus_tropicalis/">ftp://ftp.ensembl.org/pub/release-78/fasta/xenopus_tropicalis/</a>                                                                     |
